# Supplementary material for: Feasibility of Brewer’s Spent Yeast Microcapsules as Targeted Oral Carriers
Source: MDPI journal article supplement (doi:10.3390/foods12020246), 2023-01-05
Supplement: s1 [file s1]

**Supplementary Table S2.** List of proteins used for quality control of microarray, their sources, conditions of analysis and their reported carbohydrate-binding specificity.

| Proteins                                                                       | Source <sup>a</sup>          | Reported carbohydrate-binding specificity / Recognition <sup>b</sup>                                                                                                                                      | Analysis conc. | Detection reagents & concentrations <sup>c</sup>                                                                                                  | Blocking solution <sup>d</sup> |
|--------------------------------------------------------------------------------|------------------------------|-----------------------------------------------------------------------------------------------------------------------------------------------------------------------------------------------------------|----------------|---------------------------------------------------------------------------------------------------------------------------------------------------|--------------------------------|
| <b>LECTINS</b>                                                                 |                              |                                                                                                                                                                                                           |                |                                                                                                                                                   |                                |
| <b>Human Dectin-1</b>                                                          | Sino Biological (10215-H01H) | $\beta$ 1,3-glucooligomers with a minimum chain length of DP-10 or DP-11 (Palma <i>et al.</i> , 2006; Palma <i>et al.</i> , 2015)                                                                         | 10 $\mu$ g/ml  | BI anti-human IgG (Vector BA-3000); 10 $\mu$ g/mL                                                                                                 | Blocker A                      |
| <b>Human DC-SIGN</b><br>(Dendritic cell-specific ICAM-3-grabbing non-integrin) | Sino Biological (10200-H01H) | Recognition of fuco- (Silva <i>et al.</i> , 2021), manno- (Gao <i>et al.</i> , 2021; Geissner <i>et al.</i> , 2019; Vendele <i>et al.</i> , 2020) and gluco-oligosaccharides (Palma <i>et al.</i> , 2015) | 10 $\mu$ g/ml  | BI anti-human IgG (Vector BA-3000); 10 $\mu$ g/mL                                                                                                 | Blocker A                      |
| <b>Mouse Dectin-2</b>                                                          | R&D Systems (1525-DC-050)    | Recognition of $\alpha$ -mannose residues, such as high mannose-type <i>N</i> -glycans (Man <sub>8</sub> GlcNAc <sub>2</sub> ) (Vendele <i>et al.</i> , 2020)                                             | 5 $\mu$ g/mL   | Ab1: mouse monoclonal anti-poly-Histidine (Sigma SAB4200620); 15 $\mu$ g/mL; Ab2: BI anti-mouse IgG (whole molecule) (Sigma B7264); 15 $\mu$ g/mL | Blocker A                      |
| <b>ConA</b><br>(Concanavalin A)                                                | Vector (B-1005-5)            | Terminal $\alpha$ -Man-linked oligosaccharides (Pejchal <i>et al.</i> , 2011)<br>Terminal $\alpha$ - or $\beta$ -Glc-linked oligosaccharides (Geissner <i>et al.</i> , 2019; Palma <i>et al.</i> , 2015)  | 5 $\mu$ g/mL   | N/A                                                                                                                                               | Blocker B                      |
| <b>MONOCLONAL ANTIBODIES</b>                                                   |                              |                                                                                                                                                                                                           |                |                                                                                                                                                   |                                |
| <b>400-2</b>                                                                   | Biosupplies                  | Raised against $\beta$ 1,3-glucan laminarin; $\beta$ 1,3-glucose oligosaccharide sequences in $\beta$ 1,3-glucans (DP $\geq$ 2) (P. J. Meikle, Bonig, Hoogenraad, Clarke, & Stone, 1991).                 | 15 $\mu$ g/mL  | BI anti-mouse IgG (Sigma B7264); 10 $\mu$ g/mL                                                                                                    | Blocker A                      |

<sup>a</sup>The commercial source is indicated.

<sup>b</sup>The main carbohydrate-binding specificity assigned is indicated with a reference.

<sup>c</sup>Ab1, primary antibody; Ab2, secondary antibody; BI, biotinylated; N/A, not applicable.

<sup>d</sup>Blocker A: 1% (w/v) BSA, 0.02% (v/v) casein in HBS, 5 mM CaCl<sub>2</sub>; Blocker B: 3% (w/v) BSA in HBS, 5 mM CaCl<sub>2</sub>. HBS, 10 mM HEPES-buffered saline (pH 7.4), 150 mM NaCl ; BSA, bovine serum albumin (Sigma A8577); Casein (Pierce 37528).

## Supplementary References:

- Gao, C., Stavenhagen, K., Eckmair, B., McKittrick, T. R., Mehta, A. Y., Matsumoto, Y., McQuillan, A. M., Hanes, M. S., Eris, D., Baker, K. J., Jia, N., Wei, M., Heimbürg-Molinari, J., Ernst, B., & Cummings, R. D. (2021). Differential recognition of oligomannose isomers by glycan-binding proteins involved in innate and adaptive immunity. *Sci Adv*, 7(24).
- Geissner, A., Reinhardt, A., Rademacher, C., Johannssen, T., Monteiro, J., Lepenies, B., Thepaut, M., Fieschi, F., Mrazkova, J., Wimmerova, M., Schuhmacher, F., Gotze, S., Grunstein, D., Guo, X., Hahm, H. S., Kandasamy, J., Leonori, D., Martin, C. E., Parameswarappa, S. G., Pasari, S., Schlegel, M. K., Tanaka, H., Xiao, G., Yang, Y., Pereira, C. L., Anish, C., & Seeberger, P. H. (2019). Microbe-focused glycan array screening platform. *Proceedings of the National Academy of Sciences of the United States of America*, 116(6), 1958-1967.
- Meikle, P. J., Bonig, I., Hoogenraad, N. J., Clarke, A. E., & Stone, B. A. (1991). The location of (1→3)- $\beta$ -glucans in the walls of pollen tubes of *Nicotiana glauca* using a (1→3)- $\beta$ -glucan-specific monoclonal antibody. *Planta*, 185(1), 1-8.
- Palma, A. S., Feizi, T., Zhang, Y., Stoll, M. S., Lawson, A. M., Díaz-Rodríguez, E., Campanero-Rhodes, M. A., Costa, J., Gordon, S., Brown, G. D., & Chai, W. (2006). Ligands for the  $\beta$ -Glucan Receptor, Dectin-1, Assigned Using “Designer” Microarrays of Oligosaccharide Probes (Neoglycolipids) Generated from Glucan Polysaccharides\*. *Journal of Biological Chemistry*, 281(9), 5771-5779.
- Palma, A. S., Liu, Y., Zhang, H., Zhang, Y., McCleary, B. V., Yu, G., Huang, Q., Guidolin, L. S., Ciocchini, A. E., Torosantucci, A., Wang, D., Carvalho, A. L., Fontes, C. M., Mulloy, B., Childs, R. A., Feizi, T., & Chai, W. (2015). Unravelling glucan recognition systems by glycome microarrays using the designer approach and mass spectrometry. *Mol Cell Proteomics*, 14(4), 974-988.
- Pejchal, R., Doores, K. J., Walker, L. M., Khayat, R., Huang, P. S., Wang, S. K., Stanfield, R. L., Julien, J. P., Ramos, A., Crispin, M., Depetris, R., Katpally, U., Marozsan, A., Cupo, A., Malveste, S., Liu, Y., McBride, R., Ito, Y., Sanders, R. W., Ogohara, C., Paulson, J. C., Feizi, T., Scanlan, C. N., Wong, C. H., Moore, J. P., Olson, W. C., Ward, A. B., Poignard, P., Schief, W. R., Burton, D. R., & Wilson, I. A. (2011). A Potent and Broad Neutralizing Antibody Recognizes and Penetrates the HIV Glycan Shield. *Science*, 334(6059), 1097-1103.
- Silva, L. M., Correia, V. G., Moreira, A. S. P., Domingues, M. R. M., Ferreira, R. M., Figueiredo, C., Azevedo, N. F., Marcos-Pinto, R., Carneiro, F., Magalhães, A., Reis, C. A., Feizi, T., Ferreira, J. A., Coimbra, M. A., & Palma, A. S. (2021). *Helicobacter pylori* lipopolysaccharide structural domains and their recognition by immune proteins revealed with carbohydrate microarrays. *Carbohydr Polym*, 253, 117350.
- Vendele, I., Willment, J. A., Silva, L. M., Palma, A. S., Chai, W., Liu, Y., Feizi, T., Spyrou, M., Stappers, M. H. T., Brown, G. D., & Gow, N. A. R. (2020). Mannan detecting C-type lectin receptor probes recognise immune epitopes with diverse chemical, spatial and phylogenetic heterogeneity in fungal cell walls. *PLoS Pathog*, 16(1), e1007927.
